# Supplementary material for: The left ventral premotor cortex is involved in hand shaping for intransitive gestures: evidence from a two-person imitation experiment
Source: PubMed Central journal article supplement (PMC6227992; doi:10.1098/rsos.181356), 2018-10-10
Supplement: rsos181356supp1.pdf [file rsos181356supp1.pdf]

The left ventral premotor cortex is involved in hand shaping for intransitive gestures: evidence from a two-person imitation experiment

Arran T. Reader & Nicholas P. Holmes

Supplementary tables

Table 1: Mean values and main effects for actor-imitator correlation

Significant p-values (<.0063) are in bold; SH: shoulder, EL: elbow, WR: wrist, TH: thumb, IN: index finger, MI: middle finger, RI: ring finger, LI: little finger.

| Tracker | Mean(±SE) Z-value |                   |                   |                   |                   |                   |                   |                   |                   | Main effect |      |      |           |      |      |           |             |      |           |                 |      |          |  |  |
|---------|-------------------|-------------------|-------------------|-------------------|-------------------|-------------------|-------------------|-------------------|-------------------|-------------|------|------|-----------|------|------|-----------|-------------|------|-----------|-----------------|------|----------|--|--|
|         | Site              |                   |                   | Time              |                   |                   | Meaning           |                   |                   | Effector    |      |      | Site      |      |      | Time      |             |      | Meaning   |                 |      | Effector |  |  |
|         | PMv               | PMd               | Vertex            | Observation       | Imitation         | Meaningful        | Meaningless       | Hand              | Finger            | F (2, 22)   | p    | η²   | F (1, 11) | p    | η²   | F (1, 11) | p           | η²   | F (1, 11) | p               | η²   |          |  |  |
| SH      | 0.515<br>(0.0468) | 0.443<br>(0.0573) | 0.545<br>(0.0365) | 0.503<br>(0.0417) | 0.499<br>(0.0416) | 0.422<br>(0.0427) | 0.580<br>(0.0457) | 0.683<br>(0.0499) | 0.319<br>(0.0378) | 3.18        | .061 | .224 | 0.065     | .803 | .006 | 22.9      | <b>.001</b> | .675 | 119       | <b>&lt;.001</b> | .915 |          |  |  |
| EL      | 1.01<br>(0.0671)  | 0.988<br>(0.0681) | 0.944<br>(0.0590) | 0.984<br>(0.0550) | 1.01<br>(0.0534)  | 0.932<br>(0.0711) | 1.06<br>(0.0460)  | 1.19<br>(0.0500)  | 0.804<br>(0.0630) | 0.056       | .946 | .005 | 4.16      | .066 | .275 | 6.19      | .030        | .360 | 109       | <b>&lt;.001</b> | .908 |          |  |  |
| WR      | 1.94<br>(0.0708)  | 1.92<br>(0.0675)  | 2.02<br>(0.0488)  | 1.95<br>(0.0617)  | 1.98<br>(0.0543)  | 2.02<br>(0.0666)  | 1.90<br>(0.0528)  | 2.00<br>(0.0708)  | 1.92<br>(0.0483)  | 2.31        | .123 | .174 | 4.80      | .051 | .304 | 10.8      | .007        | .496 | 5.02      | .047            | .313 |          |  |  |
| TH      | 1.64<br>(0.0584)  | 1.63<br>(0.0516)  | 1.64<br>(0.0376)  | 1.62<br>(0.0480)  | 1.64<br>(0.0455)  | 1.67<br>(0.0478)  | 1.60<br>(0.0470)  | 1.69<br>(0.0548)  | 1.58<br>(0.0421)  | 0.020       | .980 | .002 | 1.52      | .244 | .121 | 7.18      | .021        | .395 | 10.9      | .007            | .497 |          |  |  |
| IN      | 1.58<br>(0.0481)  | 1.57<br>(0.0450)  | 1.59<br>(0.0297)  | 1.57<br>(0.0353)  | 1.59<br>(0.0350)  | 1.62<br>(0.0369)  | 1.54<br>(0.0372)  | 1.70<br>(0.0434)  | 1.46<br>(0.0352)  | 0.061       | .941 | .005 | 1.01      | .336 | .084 | 9.02      | .012        | .451 | 37.5      | <b>&lt;.001</b> | .773 |          |  |  |
| MI      | 1.63<br>(0.0507)  | 1.60<br>(0.0455)  | 1.64<br>(0.0399)  | 1.62<br>(0.0418)  | 1.63<br>(0.0383)  | 1.68<br>(0.0394)  | 1.56<br>(0.0443)  | 1.66<br>(0.0585)  | 1.59<br>(0.0296)  | 0.701       | .507 | .060 | 1.57      | .237 | .125 | 17.9      | <b>.001</b> | .619 | 2.31      | .156            | .174 |          |  |  |
| RI      | 1.67<br>(0.0445)  | 1.68<br>(0.0444)  | 1.69<br>(0.0291)  | 1.68<br>(0.0352)  | 1.68<br>(0.0305)  | 1.73<br>(0.0312)  | 1.63<br>(0.0372)  | 1.73<br>(0.0464)  | 1.63<br>(0.0261)  | 0.120       | .888 | .011 | 0.454     | .514 | .040 | 16.8      | <b>.002</b> | .605 | 7.98      | .017            | .420 |          |  |  |
| LI      | 1.71<br>(0.0471)  | 1.71<br>(0.0467)  | 1.73<br>(0.0315)  | 1.72<br>(0.0397)  | 1.72<br>(0.0324)  | 1.76<br>(0.0353)  | 1.68<br>(0.0393)  | 1.77<br>(0.0501)  | 1.67<br>(0.0256)  | 0.158       | .855 | .014 | 0.044     | .838 | .004 | 12.9      | <b>.004</b> | .539 | 7.32      | .020            | .400 |          |  |  |

Table 2: Two-way interactions for actor-imitator correlation

SH: shoulder, EL: elbow, WR: wrist, TH: thumb, IN: index finger, MI: middle finger, RI: ring finger, LI: little finger.

| Tracker | Site*time |      |      | Site*meaning |      |      | Site*effector |               |      | Time*meaning |           |      | Time*effector |           |      | Meaning*effector |           |      |                 |
|---------|-----------|------|------|--------------|------|------|---------------|---------------|------|--------------|-----------|------|---------------|-----------|------|------------------|-----------|------|-----------------|
|         | F (2, 22) | p    | η²   | F (2, 22)    | p    | η²   | F (2, 22)     | df            | p    | η²           | F (1, 11) | p    | η²            | F (1, 11) | p    | η²               | F (1, 11) | p    | η²              |
| SH      | 0.234     | .793 | .021 | 0.410        | .668 | .036 | 1.27          | 2, 22         | .302 | .103         | 0.100     | .757 | .009          | 1.41      | .260 | .114             | 7.52      | .019 | .406            |
| EL      | 1.16      | .334 | .095 | 0.454        | .61  | .040 | 2.55          | 2, 22         | .101 | .188         | 0.242     | .633 | .022          | 2.44      | .147 | .181             | 0.050     | .828 | .004            |
| WR      | 0.270     | .765 | .024 | 0.488        | .620 | .042 | 1.02          | 2, 22         | .376 | .085         | 2.20      | .101 | .225          | 0.267     | .615 | .024             | 0.003     | .955 | <b>&lt;.001</b> |
| TH      | 0.827     | .451 | .070 | 0.501        | .613 | .044 | 0.078         | 1.30,<br>14.3 | .846 | .007         | 0.587     | .260 | .051          | 0.239     | .635 | .021             | 5.08      | .046 | .316            |
| IN      | 0.852     | .440 | .072 | 1.23         | .312 | .101 | 0.047         | 2, 22         | .892 | .010         | 0.033     | .858 | .003          | 0.009     | .924 | .001             | 4.73      | .052 | .301            |
| MI      | 0.872     | .432 | .073 | 1.67         | .211 | .132 | 0.166         | 2, 22         | .848 | .015         | 2.37      | .152 | .177          | 0.029     | .867 | .003             | 7.22      | .021 | .396            |
| RI      | 1.35      | .279 | .110 | 3.16         | .062 | .223 | 0.183         | 2, 22         | .834 | .016         | 1.50      | .246 | .120          | 0.001     | .981 | <b>&lt;.001</b>  | 4.93      | .048 | .309            |
| LI      | 2.74      | .086 | .200 | 3.06         | .067 | .218 | 0.383         | 2, 22         | .687 | .034         | 4.19      | .065 | .276          | 0.729     | .411 | .062             | 7.16      | .022 | .394            |

**Table 3: Three- and four-way interactions for actor-imitator correlation**

SH: shoulder, EL: elbow, WR: wrist, TH: thumb, IN: index finger, MI: middle finger, RI: ring finger, LI: little finger.

| Tracker | Site*time* |            |      | Site*time* |           |      | Site*meaning* |           |      | Time*meaning* |           |      | Site*time*       |           |      |          |
|---------|------------|------------|------|------------|-----------|------|---------------|-----------|------|---------------|-----------|------|------------------|-----------|------|----------|
|         | meaning    |            |      | effector   |           |      | effector      |           |      | effector      |           |      | meaning*effector |           |      |          |
|         | F          | df         | p    | $\eta^2$   | F (2, 22) | p    | $\eta^2$      | F (2, 22) | p    | $\eta^2$      | F (1, 11) | p    | $\eta^2$         | F (2, 22) | p    | $\eta^2$ |
| SH      | 0.795      | 1.30, 14.3 | .420 | .067       | 0.446     | .646 | .039          | 1.66      | .213 | .131          | 2.42      | .148 | .180             | 0.266     | .769 | .024     |
| EL      | 0.929      | 2, 22      | .410 | .078       | 0.036     | .964 | .181          | 0.391     | .681 | .034          | 0.326     | .580 | .029             | 1.37      | .276 | .110     |
| WR      | 0.625      | 2, 22      | .545 | .054       | 0.657     | .528 | .056          | 1.02      | .377 | .085          | 1.44      | .255 | .116             | 0.692     | .511 | .059     |
| TH      | 0.190      | 2, 22      | .828 | .017       | 0.823     | .452 | .070          | 0.048     | .953 | .004          | 2.20      | .166 | .167             | 1.96      | .165 | .151     |
| IN      | 0.115      | 2, 22      | .892 | .010       | 0.680     | .517 | .058          | 0.697     | .509 | .060          | 6.86      | .024 | .384             | 2.58      | .099 | .190     |
| MI      | 0.383      | 2, 22      | .686 | .034       | 0.408     | .670 | .036          | 0.198     | .822 | .018          | 0.588     | .459 | .051             | 1.28      | .297 | .104     |
| RI      | 0.666      | 2, 22      | .524 | .057       | 0.762     | .478 | .065          | 0.191     | .827 | .017          | 2.34      | .154 | .176             | 1.49      | .246 | .120     |
| LI      | 0.156      | 2, 22      | .857 | .014       | 1.05      | .266 | .087          | 0.074     | .929 | .007          | 0.142     | .714 | .013             | 2.19      | .136 | .166     |

**Table 4: Bonferroni-corrected paired t-tests for elbow site\*effector interaction**

Bonferroni-corrected alpha cutoff = .025.

| Variable                   | Mean( $\pm$ SE) values |                |                |                |                |                | Paired t-tests |      |              |      |           |      |              |      |              |      |           |      |
|----------------------------|------------------------|----------------|----------------|----------------|----------------|----------------|----------------|------|--------------|------|-----------|------|--------------|------|--------------|------|-----------|------|
|                            | Hand                   |                |                | Finger         |                |                | Hand           |      |              |      | Finger    |      |              |      |              |      |           |      |
|                            | PMv                    | PMd            | Vertex         | PMv            | PMd            | Vertex         | PMv – Vertex   |      | PMd – Vertex |      | PMv – PMd |      | PMv – Vertex |      | PMd – Vertex |      | PMv – PMd |      |
|                            |                        |                |                |                |                |                | t (11)         | p    | t (11)       | p    | t (11)    | p    | t (11)       | p    | t (11)       | p    | t (11)    | p    |
| PA<br>(cm/s <sup>2</sup> ) | 236<br>(17.4)          | 229<br>(11.8)  | 224<br>(13.3)  | 159<br>(11.6)  | 167<br>(7.76)  | 157<br>(6.89)  | 1.03           | .324 | 0.548        | .595 | 0.868     | .404 | 0.189        | .853 | 1.523        | .156 | -1.10     | .295 |
| PV<br>(cm/s)               | 47.2<br>(3.23)         | 44.0<br>(2.61) | 45.4<br>(2.47) | 25.2<br>(1.63) | 26.2<br>(1.35) | 26.0<br>(1.30) | 0.704          | .496 | -0.845       | .416 | 1.35      | .205 | -0.671       | .516 | 0.140        | .891 | -0.721    | .486 |
| PD<br>(cm/s <sup>2</sup> ) | -181<br>(14.7)         | -174<br>(10.3) | -177<br>(9.43) | -135<br>(11.6) | -140<br>(6.79) | -129<br>(4.72) | -0.442         | .667 | 0.372        | .717 | -0.858    | .409 | -0.710       | .492 | -2.01        | .070 | 0.633     | .539 |

**Figure 1: Resampled mean velocity curve for the imitator thumb comparing PMv and PMd**

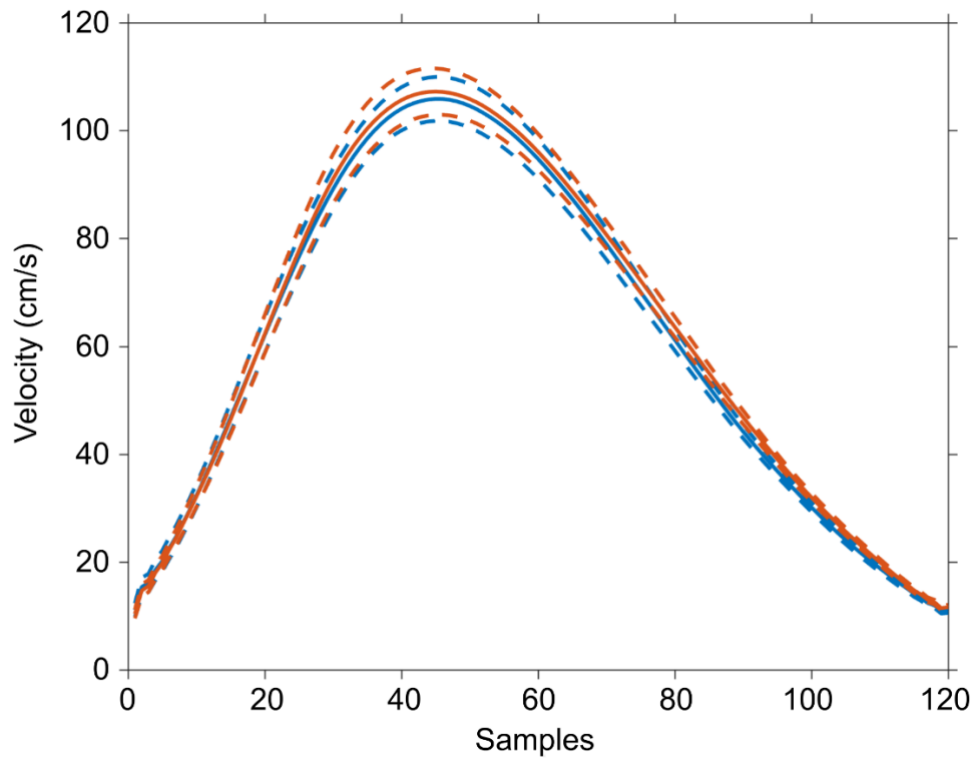

**Blue = PMv, red = PMd, Dashed lines = SE.**

**Figure 2: Resampled mean velocity curve for the imitator index finger comparing observation and imitation stimulation over the PMv**

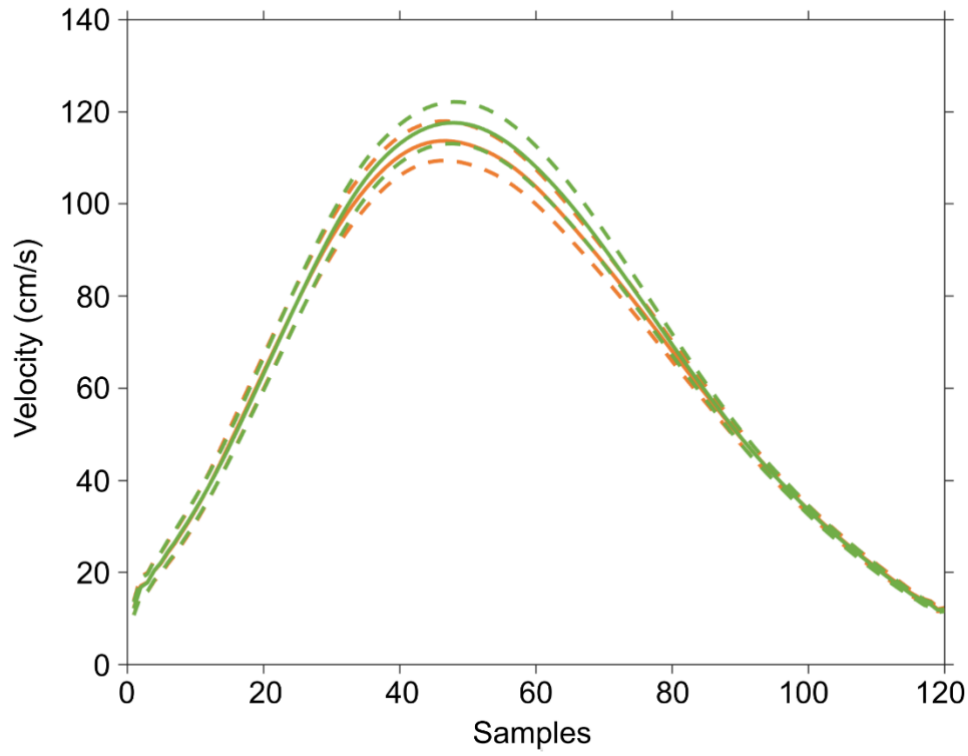

**Orange = observation, green = imitation. Dashed lines = SE.**

**Figure 3: t-statistic plots for stimulation-site related interactions**

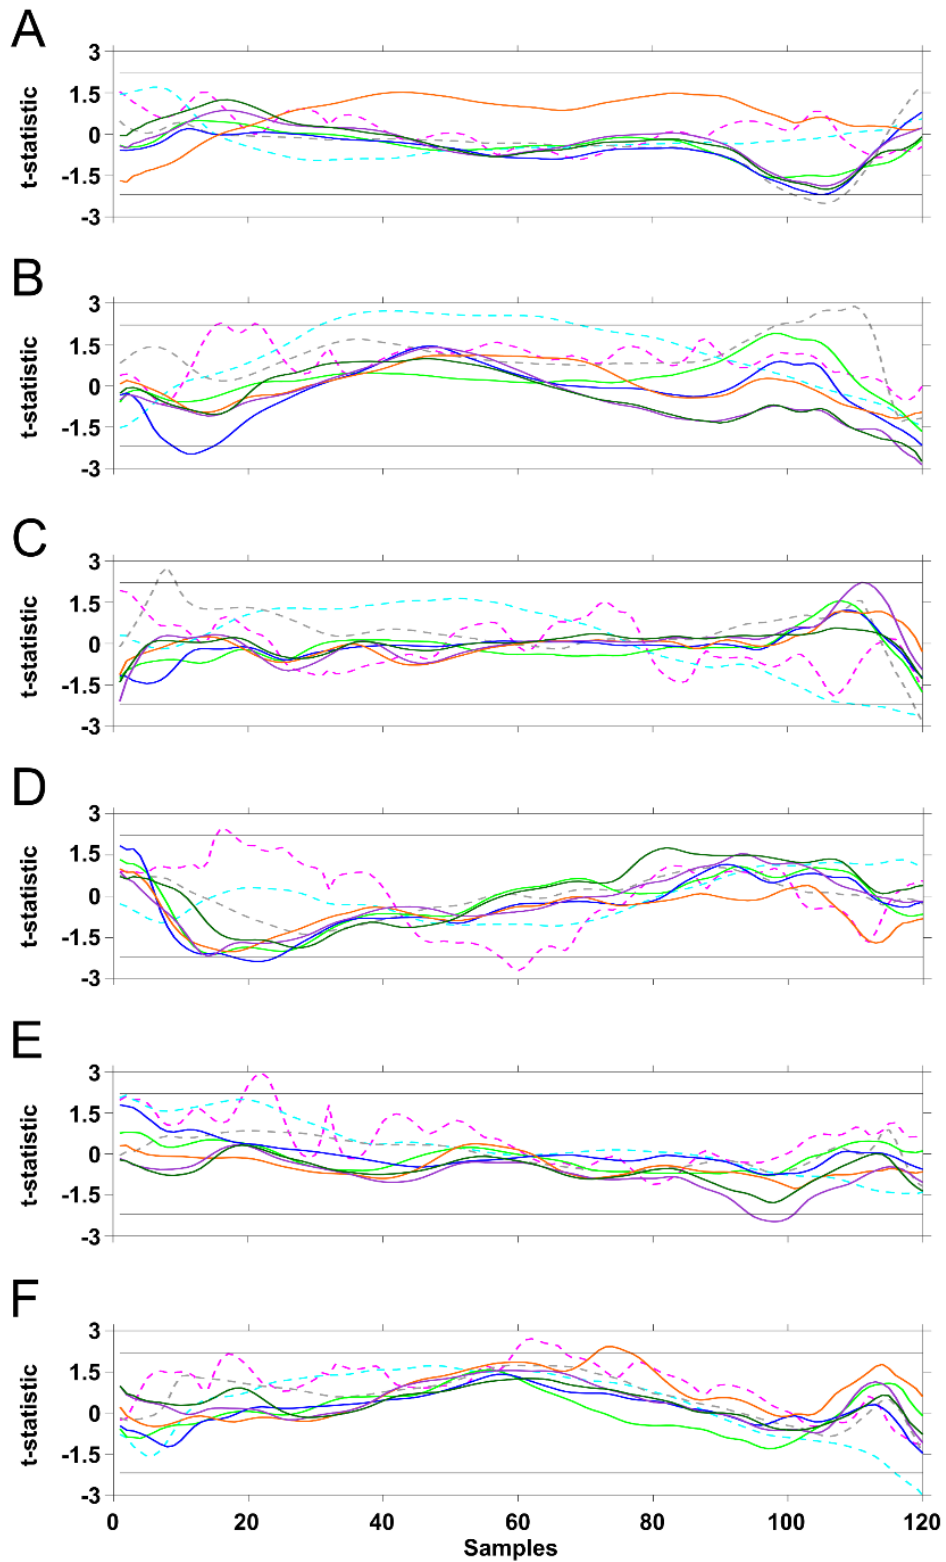

**A) site\*meaning B) site\*effector C) site\*time\*meaning D) site\*time\*effector E) site\*meaning\*effector F) site\*time\*meaning\*effector; Horizontal lines indicate positive and negative critical t-values; Dashed magenta = shoulder, dashed cyan = elbow, dashed grey = wrist, light green = thumb, blue = index finger, orange = middle finger, purple = ring finger, dark green = little finger.**
